RESEARCH ARTICLE

# Molecular Evolution and Genetic Variation of *G2-Like* Transcription Factor Genes in Maize

Fang Liu<sup>☯</sup>, Yunjian Xu<sup>☯</sup>, Guomin Han, Lingyan Zhou, Asif Ali, Suwen Zhu, Xiaoyu Li<sup>\*</sup>

Key Laboratory of Crop Biology of Anhui Province, Anhui Agricultural University, Hefei, China

☯ These authors contributed equally to this work.

\* [lixiaoyu@ahau.edu.cn](mailto:lixiaoyu@ahau.edu.cn)

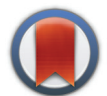

CrossMark  
click for updates

**OPEN ACCESS**

**Citation:** Liu F, Xu Y, Han G, Zhou L, Ali A, Zhu S, et al. (2016) Molecular Evolution and Genetic Variation of *G2-Like* Transcription Factor Genes in Maize. PLoS ONE 11(8): e0161763. doi:10.1371/journal.pone.0161763

**Editor:** Xiu-Qing Li, Agriculture and Agri-Food Canada, CANADA

**Received:** February 16, 2016

**Accepted:** August 11, 2016

**Published:** August 25, 2016

**Copyright:** © 2016 Liu et al. This is an open access article distributed under the terms of the [Creative Commons Attribution License](https://creativecommons.org/licenses/by/4.0/), which permits unrestricted use, distribution, and reproduction in any medium, provided the original author and source are credited.

**Data Availability Statement:** The 85 maize inbred lines sequencing SNP data are available upon request to Chuanxiao Xie ([xiechuanxiao@caas.cn](mailto:xiechuanxiao@caas.cn)) National Key Facility for Crop Gene Resources and Genetic Improvement, Institute of Crop Science, Chinese Academy of Agricultural Sciences. Other remaining data were provided as a Supporting Information files.

**Funding:** The authors received no specific funding for this work.

**Competing Interests:** The authors have declared that no competing interests exist.

## Abstract

The productivity of maize (*Zea mays* L.) depends on the development of chloroplasts, and *G2-like* transcription factors play a central role in regulating chloroplast development. In this study, we identified 59 *G2-like* genes in the B73 maize genome and systematically analyzed these genes at the molecular and evolutionary levels. Based on gene structure character, motif compositions and phylogenetic analysis, maize *G2-like* genes (*ZmG1-ZmG59*) were divided into seven groups (I-VII). By synteny analysis, 18 collinear gene pairs and strongly conserved microsynteny among regions hosting *G2-like* genes across maize and sorghum were found. Here, we showed that the vast majority of *ZmG* gene duplications resulted from whole genome duplication events rather than tandem duplications. After gene duplication events, some *ZmG* genes were silenced. The functions of *G2-like* genes were multifarious and most genes that are expressed in green tissues may relate to maize photosynthesis. The qRT-PCR showed that the expression of these genes was sensitive to low temperature and drought. Furthermore, we analyzed differences of *ZmGs* specific to cultivars in temperate and tropical regions at the population level. Interestingly, the single nucleotide polymorphism (SNP) analysis revealed that nucleotide polymorphism associated with different temperature zones. Above all, *G2-like* genes were highly conserved during evolution, but polymorphism could be caused due to a different geographical location. Moreover, *G2-like* genes might be related to cold and drought stresses.

## Introduction

The chloroplasts of higher plants are believed to have originated from aquatic single-celled cyanobacteria more than 2.5 billion years ago [1–3]. Chloroplasts contain the green pigment chlorophyll and are responsible for the light-powered reactions of photosynthesis, upon which essentially all life depends [2–4]. Recent studies supported the view that chloroplasts were derived from a primary endosymbiotic event involving such cyanobacteria [5–8]. As a result, the regulation of chloroplast biogenesis involves cooperation between the nucleus and chloroplast. Plastids play a variety of roles in addition to functioning in photosynthesis, including roles in the synthesis of amino acids, fatty acids, purine and pyrimidine bases, terpenoids and

various pigments and hormones, as well as functioning in key aspects of nitrogen and sulfur assimilation [2,9–11].

Proplastids in subepidermal meristematic cells (or etioplasts in dark-grown cotyledons) are transformed into mesophyll chloroplasts upon exposure to light [1,12]. Approximately 50% of genes are differentially expressed during this transformation [1,13–15] and transcription factors play key regulation in this process. Members of *Golden 2-like* (*G2-like*) family have been characterized with roles of regulating the formation of chloroplasts during the transition and early maturation phases [1,16]. And *G2-like* genes are indispensable for chloroplast development in angiosperms.

*G2-like* genes are members of the recently categorized GARP superfamily of transcription factors [17,18]. Within the GARP family, *G2-like* genes are monophyletic, while interestingly, gene duplications have occurred independently in monocots and eudicots [19]. Most *G2-like* genes have two domains, including a Myb-DNA binding domain (DBD; containing an HLH motif) and a C-terminal domain (containing a conserved GCT box). Several chloroplast development-related transcription factors have been reported in plants. For example, *ACCUMULATION AND REPLICATION OF CHLOROPLASTS5* encodes a cytoplasmically localized dynamin-like protein that regulates chloroplast division in *Arabidopsis thaliana* [20]. Two transposase-derived transcription factors, FAR-RED ELONGATED HYPOCOTYL3 (FHY3) and FAR-RED IMPAIRED RESPONSE1 (FAR1), are positive regulators of chlorophyll biosynthesis in *Arabidopsis* [21]. *Golden2-like* (*GLK*) genes regulate chloroplast development in the monocot maize (*Zea mays* L.) and in the eudicot *Arabidopsis* [4,21–24]. *GLK* genes help coregulate and synchronize the expression of a suite of nucleus photosynthetic genes and thus act to optimize photosynthetic capacity under varying environmental and developmental conditions [25]. *GLK* overexpression enhances the expression of genes related to fruit photosynthesis and chloroplast development, leading to elevated carbohydrate and carotenoid levels in ripe fruit [26]. *SIGLK2* influences photosynthesis in developing fruit, contributing to mature fruit characteristics [26]. *ZmGLK1* is thought to regulate mesophyll cell chloroplast development in C4 tissues, and *GLK* gene pairs act redundantly to promote chloroplast development in C3 species [4,23]. In addition, overexpression of *AtGLK1* (35S:*AtGLK1*) in *Arabidopsis* also confers resistance to the cereal pathogen *Fusarium graminearum* [27]. Maize is a model genetic system and one of the world's highest valued crops, accounting for billions of dollars of annual agricultural revenue [28]. To further increase crop productivity, one way is to improve the stress and disease resistance. *G2-like* genes might have a function in stress and disease resistance. Although *G2-like* transcription factors were first characterized in maize [24], a systematic analysis and comparison of *G2-like* genes in maize has not previously been reported. In this study, systems analysis and population SNP analysis were performed to gain insight into the evolutionary trajectory of *G2-like* gene in maize expression patterns of some important *ZmG* genes were also investigated under cold and drought conditions.

## Materials and Methods

### Identification of *G2-like* genes

Maize protein and nucleic acid sequences were obtained from maize genome database (<http://www.maizesequence.org>). Sorghum data were downloaded from Phytozome (v9.1). DNATOOLS software was used to construct a local database of maize nucleotide and protein sequences. Previously reported sequences of *Arabidopsis* *G2-like* protein sequences were used as queries to search against the maize and sorghum protein database with BLASTP (E-values below 0.001). All candidate sequences that met the standards were confirmed to be *G2-like* proteins using Pfam (<http://pfam.xfam.org/>) and SMART (<http://smart.embl-heidelberg.de/>).

Finally, sequences of all confirmed proteins were aligned using MEGA6 software [29], and redundant sequences were removed manually (all sequence data in supplementary file). Physical parameters of these proteins including molecular mass (kDa), and isoelectric point (pI) were estimated using the compute pI/Mw tool in ExPASy ([http://web.expasy.org/compute\\_pi/](http://web.expasy.org/compute_pi/)). Protein subcellular localization was predicted by online softwares: TargetP online server (<http://www.expasy.org/>), SubLoc online server (<http://www.bioinfo.tsinghua.edu.cn/SubLoc/>) and WoLF PSORT online server (<http://www.genscript.com/>).

### Phylogenetic and motif analysis of *G2-like* genes

A neighbor-joining phylogenetic tree of *G2-like* genes from maize and sorghum was generated with MEGA6 software [29]. The confidence limits of each branch were assessed by 1,000 bootstrap replications and expressed as percentage values.

Conserved motifs among maize *G2-like* genes were examined using MEME software (<http://meme-suite.org/>) [30]. The width of each motif was limited to 6–50, and the maximum number of motifs was set to 20. In addition, structural motif annotation was performed using Pfam (<http://pfam.xfam.org/>) and SMART (<http://smart.embl-heidelberg.de/>) online service.

### Chromosomal locations, gene structure and duplication events of *G2-like* genes

*G2-like* genes were mapped to the maize chromosomes according to their position information from maize genomic database (<http://www.maizesequence.org>). MapInspect software ([http://www.plantbreeding.wur.nl/uk/software\\_mapinspect.html](http://www.plantbreeding.wur.nl/uk/software_mapinspect.html)) was subsequently used to graphically portray *G2-like* genes from maize. Introns and exons were predicted via the online tool Gene Structure Display Server 2.0 (<http://gsds.cbi.pku.edu.cn/>) [31]. The duplication pattern for each *G2-like* genes was analyzed by MCScanX software (<http://chibba.pgml.uga.edu/mcscan2/>) [32]. Then, whole-genome BLASTP analysis of maize and sorghum were performed using local blast software with e-value under  $1e-5$ . Blast outputs and position of all protein-coding genes were imported into Circos software (<http://circos.ca/>) [33] and genes were classified into various types of duplications.

The  $K_a$  and  $K_s$  were calculated by DnaSPv5.0 [34]. The ratio of nonsynonymous to synonymous nucleotide substitutions ( $K_a/K_s$  ratios between paralogs) was analyzed to detect the mode of selection. Values of  $K_a/K_s > 1$ ,  $= 1$  and  $< 1$  represent positive selection, neutral selection and purifying selection, respectively [35].

### Expression pattern analysis

Gene expression data from Maize B73 transcriptomes were used to draw a heat map, including germinating seeds, primary roots, stems, SAMs (shoot apical meristem), leaves, endosperm, embryos and whole seeds [36,37]. The expression data were used to generate a heatmap using R/Bioconductor (<http://www.bioconductor.org/>).

### RNA extraction and qRT-PCR analysis

The maize inbred line B73 was grown in a greenhouse (16h light/ 8h dark,  $28 \pm 2^\circ\text{C}$ ). After 3 weeks, seedlings were treated with cold and drought stresses, respectively. For cold stress, leaves were sampled at 0h, 6h, 12h and 24h after cold stress ( $4^\circ\text{C}$ ) treatment. For drought stress, leaves were collected at 0h, 0.5h, 1h, 2h, 3h and 6h after treated with 20% PEG6000. Total RNAs of all the samples collected in this study were extracted using the RNAiso plus (TaKaRa) accords to the manufacturer's instructions. The DNase-treated RNA was reverse-transcribed using First-

Strand cDNA Synthesis Kit (TRANSGEN). Reaction was used SYBR Green Master Mix reagent (Roche). The qRT-PCR was performed in a 20  $\mu$ l volume, which contained 10  $\mu$ l of 2 $\times$ SYBR Green Master Mix, 2  $\mu$ l diluted cDNA template, 1  $\mu$ l of each specific primer, and 6  $\mu$ l ddH<sub>2</sub>O and then performed on ABI 7300 real time system (Applied Biosystems). The qRT-PCR program was used as follows: 95°C for 10 min, followed by 40 cycles at 95°C for 15 s and 60°C for 1 min. The gene-specific primers designed by Primer 6.0 software were employed to amplify 120–300 bp PCR products unique to each gene (S7 Table). Expression level of the maize *Actin 1* gene was used as an internal control. The relative expression level of each gene was calculated as  $2^{-\Delta\Delta CT}$  [38] compared to that of untreated control plant which was set as 1. The qRT-PCR assays were performed with three biological and three technical replicates.

## Nucleotide diversity of *G2-like* genes in 85 maize inbred lines

To further investigate *G2-like* gene evolution in natural populations of maize, *G2-like* genes sequences were examined from 85 maize inbred lines grown in tropical and temperate regions combined with whole genome sequencing SNP data (unpublished data). DNASP 5.0 software was used to analyze sequence nucleotide polymorphism and gene flow. The nucleotide diversity parameter  $\pi$  ( $\pi$ ) was estimated, where  $\pi$  is the average number of nucleotide differences per site between any two DNA sequences. In addition, in gene flow analysis,  $G_{st}$  is the genetic differentiation coefficient and  $F_{st}$  is the fixed coefficient.  $\chi^2$  assessment was used to test the significance of genetic differences among groups.

## Results

### Identification and analysis of *G2-like* genes in maize

After extensive searches and alignment of the maize genome database using previously reported *Arabidopsis* *G2-like* proteins AtGLK1 (AT2G20570) and AtGLK2 (AT5G44190) [23] as BLASTP queries, a total of 59 *G2-like* genes (designated *ZmG1* to *ZmG59*) were identified (S1 Table and S1 Text). Basic information about maize *G2-like* genes is presented in S1 Table. The exon number of these 59 genes ranges from 1 to 8. The predicted molecular weights (MW) of *ZmG* proteins range from 16.68 kDa to 59.22 kDa, while their lengths range from 145 to 554 amino acids. *ZmG10* has the shortest sequence while *ZmG37* has the longest. In addition, the proteins could be divided into two groups of roughly equal size based on isoelectric point, comprising 30 acidic proteins and 29 basic proteins. Moreover, the subcellular localizations of 59 genes predicted by the three online server TargetP online server (<http://www.expasy.org/>), SubLoc online server (<http://www.bioinfo.tsinghua.edu.cn/SubLoc/>) and WoLF PSORT online server (<http://www.genscript.com/>). Combined with results from the three online server analyses, we found that most of *ZmGs* were predicted in the nucleus.

### Phylogenetic and motif analysis of maize *G2-like* genes

The phylogenetic relationships and evolutionary history of maize *G2-like* gene family were inferred by constructing a phylogenetic tree based on aligned *G2-like* protein sequences (Fig 1A). The *G2-like* family was classed into seven groups (I–VII) based on evolutionary relationships and motif analysis; Groups I to VII contain 21, 4, 5, 8, 7, 3 and 11 genes, respectively.

Motif analysis of 59 maize *G2-like* genes also proved phylogenetic kinship. Conserved motifs (Fig 1B and S2 Table) were examined using MEME software and the motif sequences were shown in S2 Table. In addition to a conserved *G2-like* Myb DNA-binding domain, each group has unique motifs that might represent their functional diversity. Group I possess a Myb-CC-LHEQLE domain (a type of MYB-like domain). MYB transcription factors play

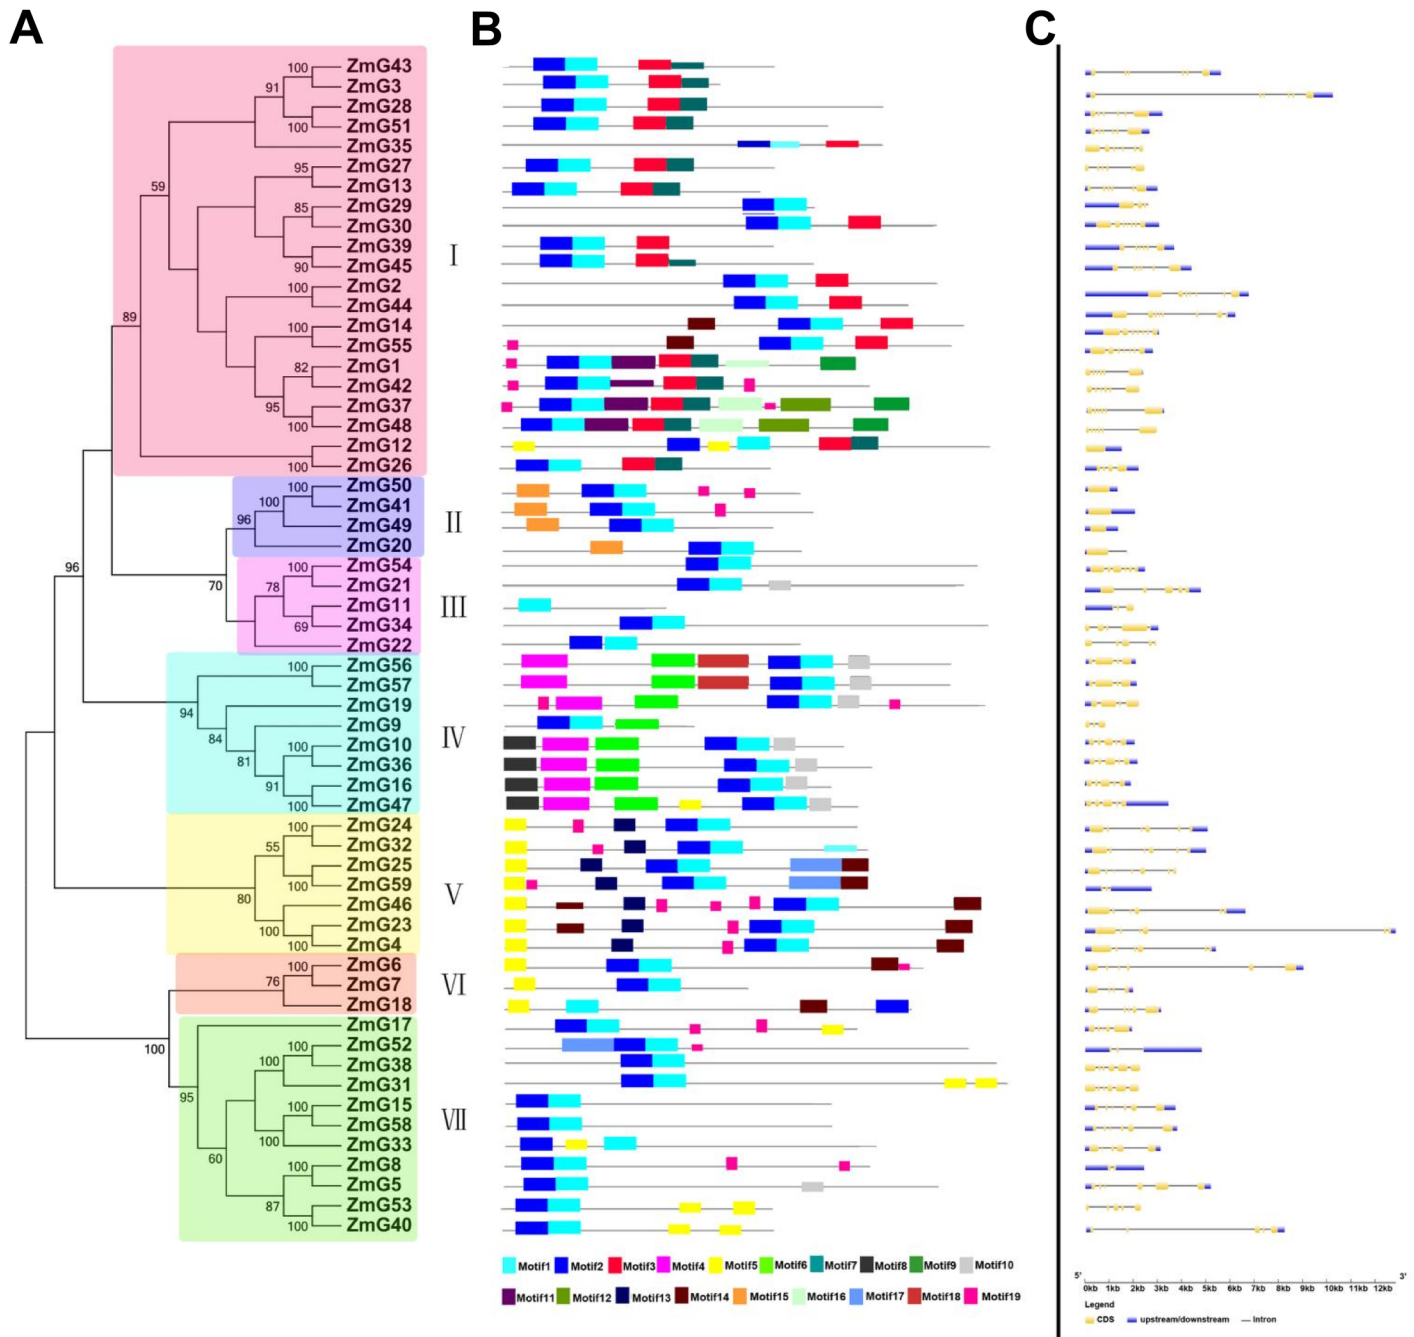

**Fig 1. Neighbor-joining phylogenetic tree, motif and structure of the 59 predicted maize G2-like genes.** (A) The phylogenetic tree, constructed with MEGA6.0, was generated based on amino acid sequences. G2-like proteins were divided into seven groups (I-VII) based on high bootstrap values (>50). (B) All motifs were identified by MEME using the complete amino acid sequences of 59 maize G2-like proteins. Different motifs are indicated by different-colored numbers (1–20) as shown in the scale at the bottom of the Fig (C) Exons and introns are indicated by yellow boxes and single lines, respectively. Thick blue lines represent untranslated regions (UTRs). The length of each G2-like gene can be estimated based on the scale at the bottom.

doi:10.1371/journal.pone.0161763.g001

diverse roles in plant development and in response to abiotic stress [39]. Besides, in gene structure analysis diverse distribution of intronic regions (from 1 to 8 in numbers) was found among *ZmG* genes (Fig 1C). In general, *ZmGs* clustered in the same group exhibit similar exon/intron structure (Fig 1C) and all *ZmGs* genes in group II have no intron.

Multiple sequence alignment of *ZmGs* and other identified *G2-like* proteins of rice *OsGLK1/2* (LOC\_Os06g24070/ LOC\_Os01g13740) and *Arabidopsis AtGLK1/2* (AT2G20570/ AT5G44190) [23] (S1 Fig) demonstrated that these sequences are particularly conserved across two regions of a putative DNA binding domain with an HLH structure (The first helix contains initial sequences PELHRR and invariably comprises 14 amino acids and the second helix contains an initial NI/VASHLQ motif. These helices are separated by a 22 amino acid loop). In a number of well-characterized transcriptional regulators, HLH domains bind DNA and mediate dimerization [40,41].

Moreover, to investigate the potential function of maize *G2-like* genes, further evolutionary relationship among *ZmGs*, *AtGLK1*, *AtGLK2*, *OsGLK1* and *OsGLK2* was investigated. As showed in S2 Fig, *AtGLK1*, *AtGLK2*, *OsGLK1* and *OsGLK2* were classed into one group (*ZmG54* classed with *OsGLK1*, and *ZmG21* classed with *OsGLK2*).

### Physical locations and duplication events of *G2-like* genes in maize

Chromosome locations of maize 59 *G2-like* genes revealed that 11, 5, 5, 4, 10, 5, 6, 3, 5 and 5 genes are distributed on chromosomes 1 to 10, respectively (Fig 2A). Although *G2-like* genes are distributed on every maize chromosome, their distribution and gene groups are nonrandom. For example, chromosome 1 not only contains the greatest number of *G2-like* genes (11), but it also exhibits the greatest variation of gene groups, whereas only three *G2-like* genes are located on chromosome 8. In addition, 18 duplicated pairs of *ZmG* genes were identified in synteny map (Fig 2B), and all of them were segmental duplication events. *ZmGs* duplication events might have resulted from ancient tetraploidy processes during the course of evolution. All chromosomes were involved in these duplication events.

The  $K_a/K_s$  ratio (ratio of nonsynonymous to synonymous nucleotide substitutions) is used as an indicator of selective pressure acting on a protein-coding gene [42]. The  $K_a$  (number of nonsynonymous substitutions per nonsynonymous site) and  $K_s$  (number of synonymous substitution per synonymous site of duplicated genes) values of 18 *ZmGs* pairs were calculated (Table 1), and results showed that five pairs genes were undergone positive selection ( $K_a/K_s > 1$ ), and others were purifying selection ( $K_a/K_s < 1$ ).

### Phylogenetic comparison of *G2-like* genes between maize and sorghum

To further analyze evolutionary relationship of *G2-like* family, *ZmGs* and *SbGs* (*G2-like* genes of sorghum) were subjected to a comprehensive phylogenetic analysis. 45 sorghum *G2-like* genes (*SbG1-SbG45*) were identified (S3 Table and S2 Text), and 11 collinear gene pairs were found (S4 Table), distributing in 9 chromosomes (except chromosome 3) (S3 Fig). Then the unrooted phylogenetic tree between *ZmGs* and *SbGs* was constructed using the full-length protein sequences (Fig 3A). The phylogenetic analysis classified the *ZmGs* into several groups together with their sorghum orthologs. To identify the evolutionary orthologous relationships within *G2-like* genes of maize and sorghum, a synteny map was plotted between maize and sorghum (Fig 3B). A total of 75 orthologous gene pairs between maize and sorghum were found (S5 Table). Across maize and sorghum, strongly conserved microsynteny among regions hosting *G2-like* genes were observed, especially in Zm1 and Sb1 (6 synteny genes), Zm3 and Sb3 (4 synteny genes), Zm5 and Sb10 (4 synteny genes), Zm5 and Sb4 (9 synteny genes), Zm7 and Sb2 (6 synteny genes), Zm9 and Sb10 (4 synteny genes).

### Digital expression analysis

Gene expression patterns in different tissues provide important information for studying gene function. Results of expression pattern analysis (Fig 4) revealed that most *G2-like* genes were

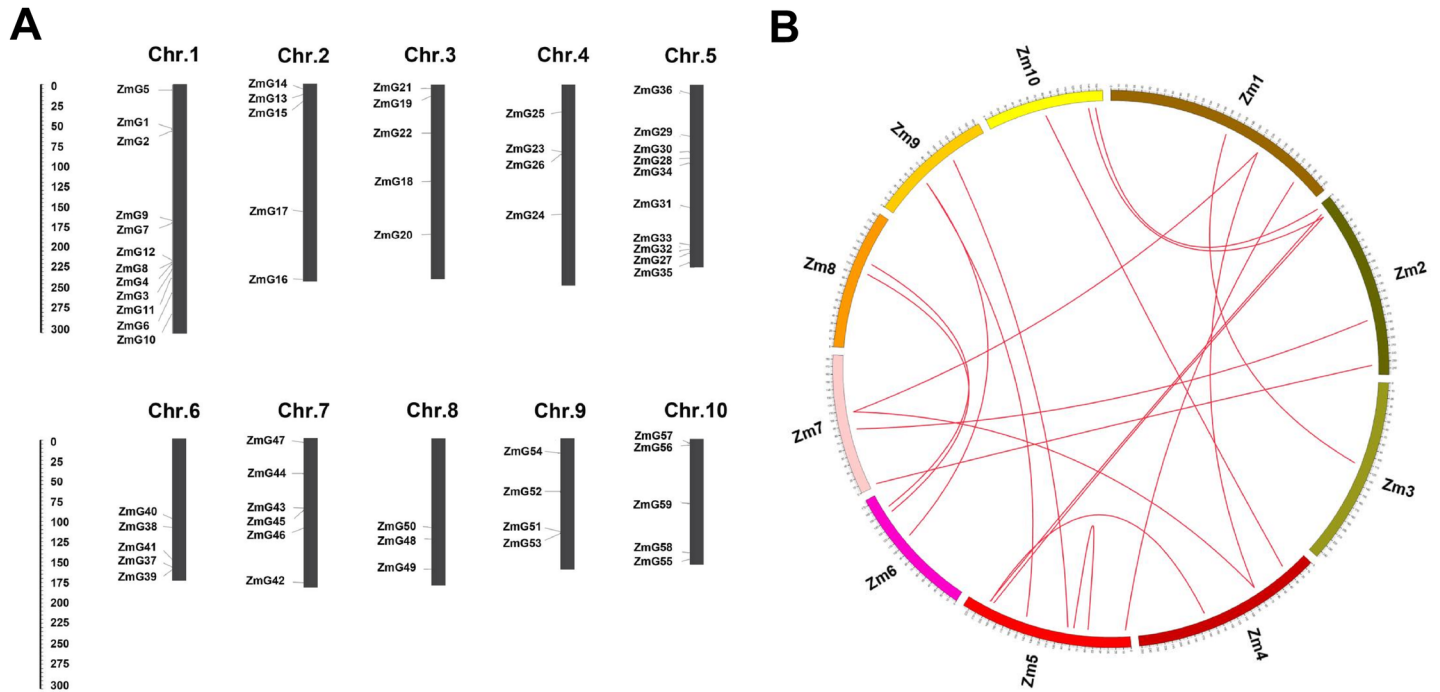

**Fig 2. Locations and duplication events of maize G2-like genes.** (A) Chromosome locations of maize G2-like genes. The scale represents megabases (Mb). The chromosome numbers are indicated above of each bar. (B) Synteny of maize G2-like gene. Numbers along each chromosome box indicate sequence lengths in megabases. All the syntenic genes were located in map, and linked by red lines.

doi:10.1371/journal.pone.0161763.g002

expressed in green tissues (e.g., stems and leaves), but some genes were expressed in non-green tissue (e.g., seeds, roots endosperm and embryos). The gene family consisted of five groups based on expression patterns (A–E). Pattern A and pattern D genes were expressed during

**Table 1. Ka/Ks and divergence analysis of paralogous maize G2-like genes.**

| Paralogous pair | Ka   | Ks   | ka/ks | Selection pressure  | Duplicate type        |
|-----------------|------|------|-------|---------------------|-----------------------|
| ZmG55/13        | 1.01 | 1.01 | 1.01  | Positive selection  | Segmental duplication |
| ZmG50/27        | 0.99 | 1.07 | 1.08  | Positive selection  | Segmental duplication |
| ZmG45/4         | 0.96 | 1.15 | 1.19  | Positive selection  | Segmental duplication |
| ZmG35/9         | 0.75 | 0.94 | 1.26  | Positive selection  | Segmental duplication |
| ZmG4/22         | 0.69 | 0.99 | 1.43  | Positive selection  | Segmental duplication |
| ZmG12/26        | 1.06 | 0.90 | 0.85  | Purifying selection | Segmental duplication |
| ZmG36/47        | 0.56 | 0.46 | 0.82  | Purifying selection | Segmental duplication |
| ZmG28/29        | 1.18 | 0.92 | 0.78  | Purifying selection | Segmental duplication |
| ZmG27/7         | 0.92 | 0.85 | 0.93  | Purifying selection | Segmental duplication |
| ZmG23/31        | 1.00 | 0.91 | 0.91  | Purifying selection | Segmental duplication |
| ZmG58/14        | 1.23 | 0.99 | 0.80  | Purifying selection | Segmental duplication |
| ZmG32/14        | 0.96 | 0.77 | 0.80  | Purifying selection | Segmental duplication |
| ZmG22/45        | 1.39 | 0.97 | 0.70  | Purifying selection | Segmental duplication |
| ZmG15/46        | 0.99 | 0.88 | 0.89  | Purifying selection | Segmental duplication |
| ZmG24/59        | 0.69 | 0.58 | 0.83  | Purifying selection | Segmental duplication |
| ZmG37/51        | 2.09 | 0.58 | 0.28  | Purifying selection | Segmental duplication |
| ZmG49/40        | 1.02 | 0.95 | 0.93  | Purifying selection | Segmental duplication |

doi:10.1371/journal.pone.0161763.t001

**A**

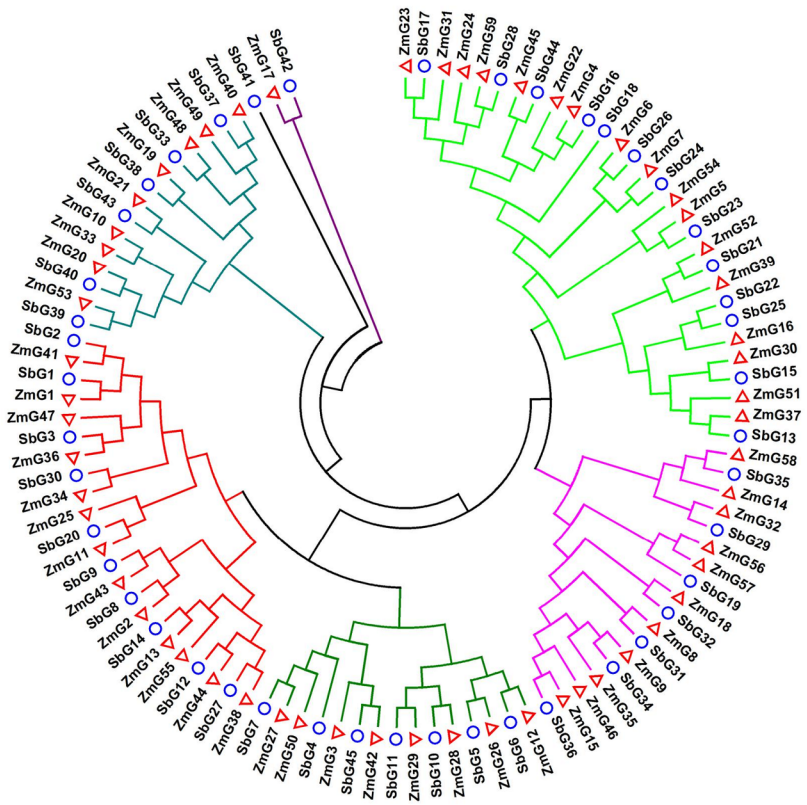

**B**

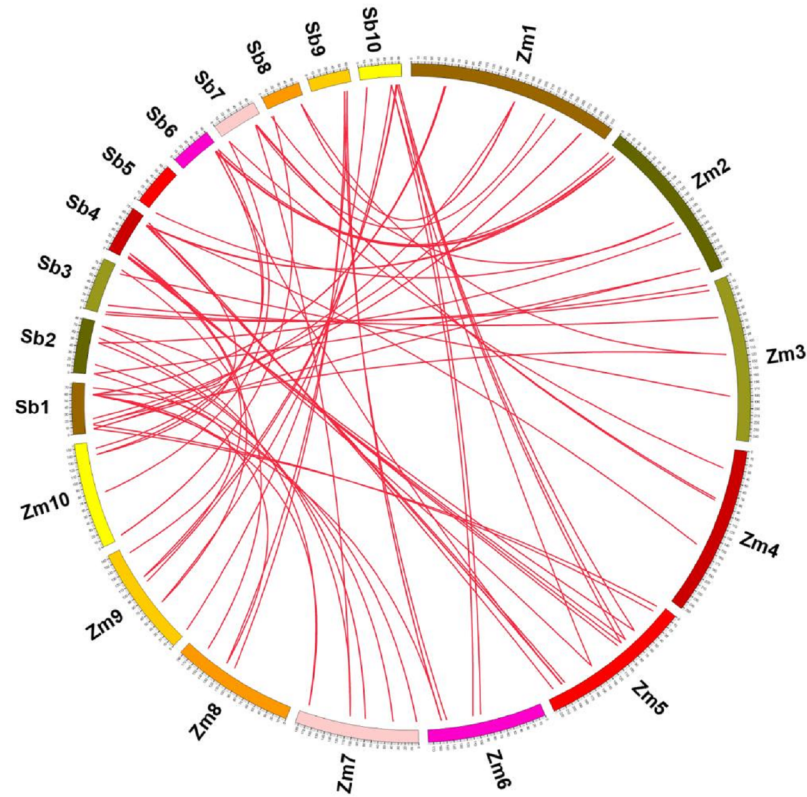



**Fig 3. Phylogenetic analysis and duplication events of G2-like proteins between maize and sorghum.** (A) Phylogenetic tree of *ZmGs* and *SbGs*. The tree was constructed using neighbor-joining method with MEGA 6.0. Maize G2-like proteins were presented by hollow red triangle, and sorghum G2-like proteins were presented hollow blue circular. (B) Synteny of maize and sorghum G2-like genes regions. Numbers along each chromosome box indicate sequence lengths in megabases. Maize and sorghum chromosome were presented by Zm1-Zm10 and Sb1-Sb10, respectively. All the syntenic genes across maize and sorghum were linked by red lines.

doi:10.1371/journal.pone.0161763.g003

almost all periods in seed, root, stem, leaf, endosperm and embryo tissue, with high levels of expression, especially for pattern A genes. Pattern B genes exhibited little or no expression in any tissue or organ, with only a few genes expressed in stems and leaves during some periods. Pattern C and E genes were mainly expressed in leaves, with high expression levels. We also examined the expression patterns of duplicated groups of G2-like genes. Pattern B contains the most duplicated genes (11 of 30 duplication genes). Pattern A, C and D include only 1, 2 and 3 duplicated genes, respectively, while pattern E contains 8 duplicated genes. Among these duplicated gene pairs, eight pairs (16 genes) shared the same expression patterns, including the following: *ZmG9* and *ZmG35* (pattern A); *ZmG23* and *ZmG31*, *ZmG24* and *ZmG59*, *ZmG58* and *ZmG14*, *ZmG32* and *ZmG58* (pattern B); *ZmG15* and *ZmG46* (pattern D); and *ZmG36* and *ZmG47*, *ZmG50* and *ZmG27* (pattern E).

### Expression levels of maize *G2-like* genes in response to cold and drought stress

In this study, we investigated possible stress-responsive *cis*-elements in the promoter regions of these genes. Two abiotic relative *cis*-elements DRE (dehydration-responsive element) and LTRE (low-temperature responsive element) were detected in these genes 2000 bp promoter sequences, which may be responsive to their stress responsiveness (Table 2). Then we further investigated expression levels of some *G2-like* genes in response to abiotic stress by subjecting three-week-old seedling leaves to drought (20% PEG6000) and cold (4°C) treatments. We choose some *ZmG* genes for the followed verification experiment-qRT-PCR, randomly. Detailed expression profiles of these *G2-like* genes under cold and drought stress conditions were presented in S4 Fig. Heat map representation for transcript expression fold change in response to these two abiotic stresses was shown in Fig 5. Ten genes (*ZmG3*, *ZmG11*, *ZmG12*, *ZmG25*, *ZmG26*, *ZmG34*, *ZmG38*, *ZmG44*, *ZmG50* and *ZmG55*) were up-regulated by both drought (Fig 5A) and cold stresses (Fig 5B), while four genes (*ZmG28*, *ZmG41*, *ZmG43* and *ZmG47*) were down-regulated under both two conditions. Moreover, the expression of five genes (*ZmG1*, *ZmG2*, *ZmG27*, *ZmG29* and *ZmG42*) were induced (Except *ZmG42*) by drought stress (Fig 5A) but repressed by cold (Fig 5B), and only one gene (*ZmG36*) was induced by cold but repressed by drought.

### Nucleotide diversity of *G2-like* genes in 85 maize inbred lines

The polymorphism of *G2-like* genes in different regions (CDS, UTR, introns and mRNA) among 85 maize inbred lines were further analyzed (Fig 6). Categories of *ZmGs* polymorphism on all regions were divided depending on  $P_i$  value ( $P_i$  is the average number of nucleotide differences per site between any two DNA sequences). Results showed that these four regions could be classified into similar groups:  $P_i \leq 0.01\%$ ,  $0.01\% < P_i \leq 0.1\%$  and  $P_i > 0.1\%$ , which we designated Type I, Type II and Type III, respectively. Type III includes the largest genes, while Type I, harboring a low level of nucleotide variation, and includes the fewest genes. We analyzed the  $K_a/K_s$  ratios of highly diverse genes among 85 maize lines (Table 3) to

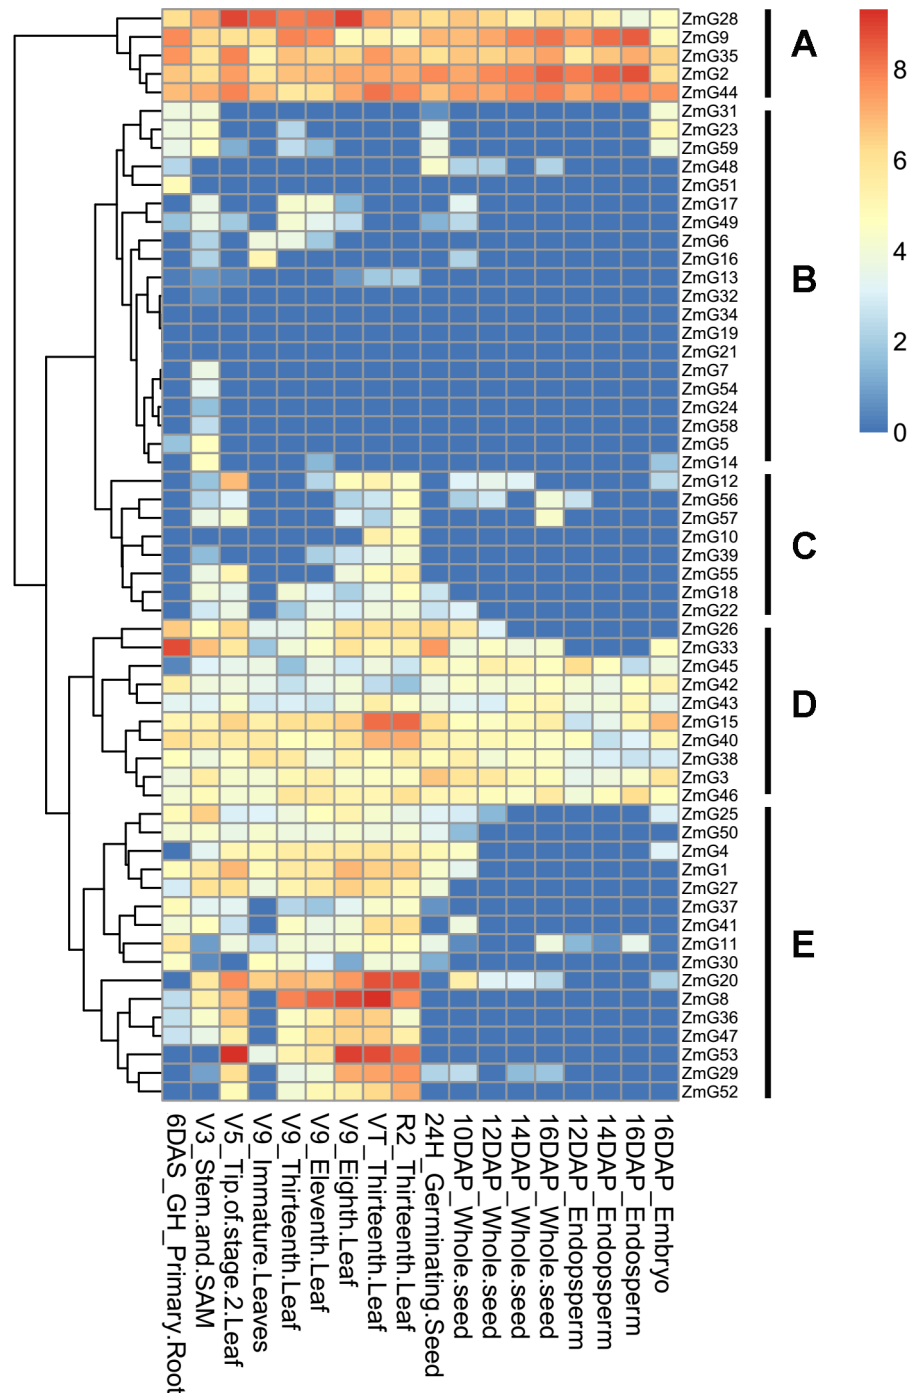

**Fig 4. Heat map of maize G2-like genes.** The expression level of each G2-like gene can be estimated based on the scale to the right. Red, yellow and blue indicate high, medium and low levels of gene expression, respectively. H, hours; DAS, days after sowing; GH, greenhouse; V, vegetative; DAP, days after pollination; VT, vegetative tasseling; R, reproductive.

doi:10.1371/journal.pone.0161763.g004

explore the selection pressure they are undergoing. Among the 23 genes examined, only one gene (*ZmG34*) was under positive selection.

**Table 2. Cis-elements in the promoter regions of stress-responsive G2-like genes.**

| Genes No. | Promotor Elements |      | Genes No. | Promotor Elements |      |
|-----------|-------------------|------|-----------|-------------------|------|
|           | DRE               | LTRE |           | DRE               | LTRE |
| ZmG1      | 2                 | 3    | ZmG31     | 0                 | 2    |
| ZmG2      | 2                 | 2    | ZmG32     | 1                 | 1    |
| ZmG3      | 0                 | 6    | ZmG33     | 0                 | 0    |
| ZmG4      | 7                 | 9    | ZmG34     | 1                 | 2    |
| ZmG5      | 0                 | 1    | ZmG35     | 0                 | 1    |
| ZmG6      | 0                 | 0    | ZmG36     | 3                 | 3    |
| ZmG7      | 8                 | 7    | ZmG37     | 0                 | 1    |
| ZmG8      | 0                 | 2    | ZmG38     | 0                 | 1    |
| ZmG9      | 0                 | 9    | ZmG39     | 3                 | 4    |
| ZmG10     | 0                 | 1    | ZmG40     | 2                 | 2    |
| ZmG11     | 2                 | 2    | ZmG41     | 0                 | 0    |
| ZmG12     | 9                 | 0    | ZmG42     | 4                 | 4    |
| ZmG13     | 2                 | 4    | ZmG43     | 1                 | 2    |
| ZmG14     | 1                 | 3    | ZmG44     | 2                 | 6    |
| ZmG15     | 1                 | 1    | ZmG45     | 0                 | 2    |
| ZmG16     | 2                 | 4    | ZmG46     | 0                 | 0    |
| ZmG17     | 1                 | 1    | ZmG47     | 1                 | 4    |
| ZmG18     | 2                 | 2    | ZmG48     | 0                 | 0    |
| ZmG19     | 0                 | 0    | ZmG49     | 4                 | 3    |
| ZmG20     | 6                 | 5    | ZmG50     | 0                 | 2    |
| ZmG21     | 0                 | 0    | ZmG51     | 0                 | 0    |
| ZmG22     | 3                 | 4    | ZmG52     | 1                 | 1    |
| ZmG23     | 1                 | 1    | ZmG53     | 0                 | 3    |
| ZmG24     | 1                 | 2    | ZmG54     | 7                 | 6    |
| ZmG25     | 1                 | 2    | ZmG55     | 1                 | 0    |
| ZmG26     | 8                 | 6    | ZmG56     | 0                 | 0    |
| ZmG27     | 1                 | 3    | ZmG57     | 0                 | 4    |
| ZmG28     | 0                 | 1    | ZmG58     | 0                 | 5    |
| ZmG29     | 0                 | 1    | ZmG59     | 0                 | 0    |
| ZmG30     | 0                 | 1    |           |                   |      |

doi:10.1371/journal.pone.0161763.t002

### Comparison of G2-like genes genetic diversity between tropical and temperate lines

Nucleotide polymorphism of G2-like genes among 85 tropical and temperate maize inbred lines were also examined (S6 Table). The single nucleotide polymorphisms (SNP) between tropical and temperate lines were not significantly different, whereas, genetic variance analysis between these lines revealed that 14 genes (27.45%) exhibited differences between tropical and temperate lines, among which 11 genes (*ZmG37*, *ZmG47*, *ZmG14*, *ZmG39*, *ZmG32*, *ZmG11*, *ZmG15*, *ZmG22*, *ZmG17*, *ZmG30* and *ZmG5*) exhibited significant differences ( $P < 0.01$ ). We further analyzed the haplotype diversity between tropical and temperate lines (S6 Table), revealing that the haplotype diversity of tropical lines is greater than temperate. Seven of the 11 genes had moderate genetic differentiation, with  $F_{st}$  values (fixation index of the subpopulation within the total) [43] between 0.05 and 0.15, while 4 other genes (*ZmG22*, *ZmG11*, *ZmG32* and *ZmG47*) had a high level of genetic differentiation, with  $F_{st}$  values greater than 0.15.

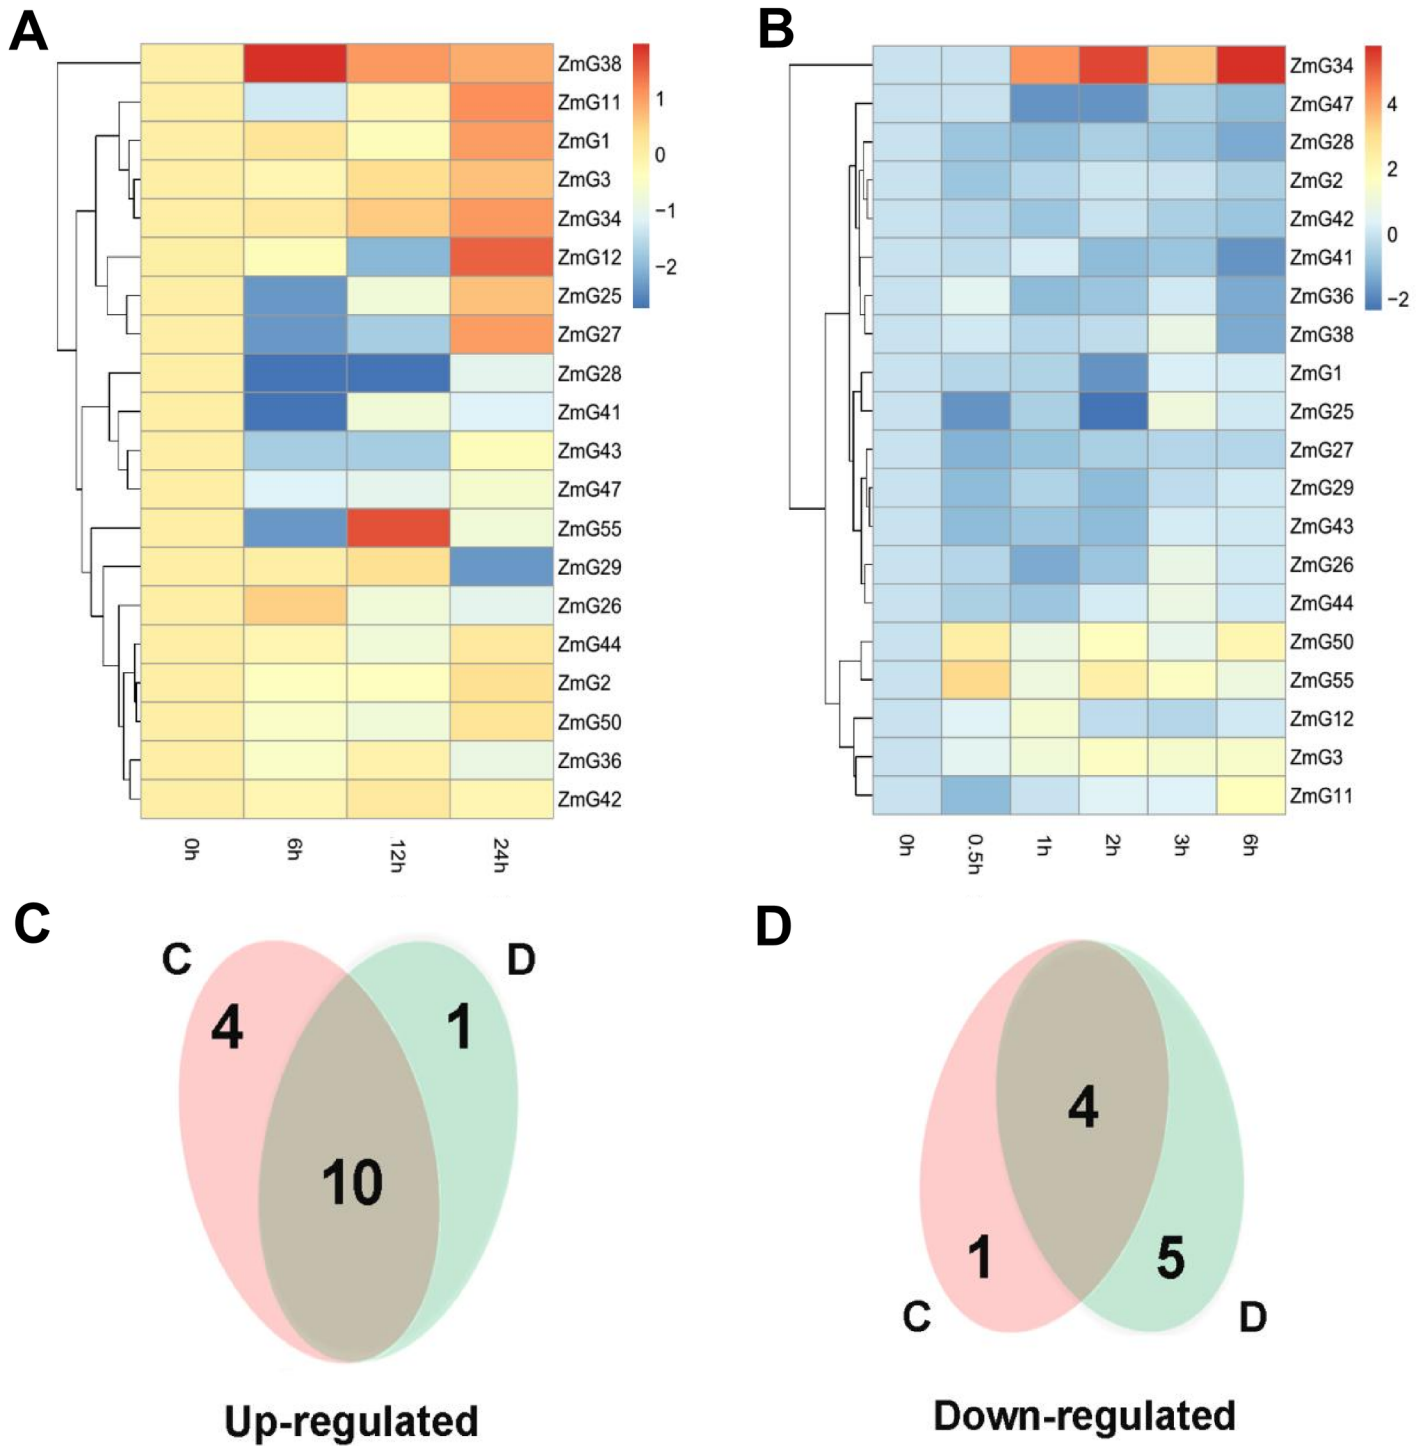

**Fig 5. Expression of twenty maize stress-responsive *G2-like* genes under stress treatments.** Three-week-old seedlings were treated with 20% PEG6000 (A) and 4°C (B), respectively. Relative expression levels of the *ZmG* genes were analyzed by quantitative qPCR, and  $\log_2$ -transformed fold-change values were used for creating the heatmap (original data were shown in S4 Fig). Venn diagram illustrated the distribution of the up-regulated (C) or down-regulated (D) *ZmG* genes response to cold and drought treatments. The common subset of genes regulated by the two stressed was marked by the overlapping circle.

doi:10.1371/journal.pone.0161763.g005

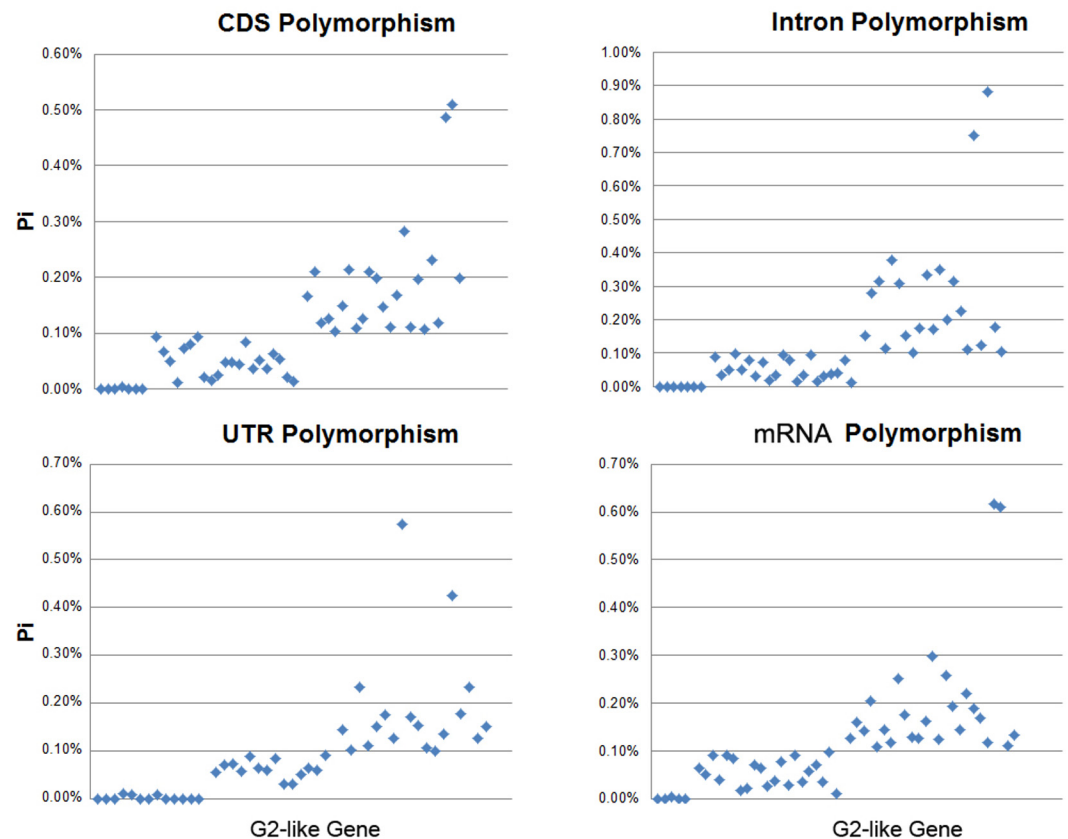

**Fig 6. Polymorphism of *G2-like* genes.** The polymorphism in different conserved regions (CDS, UTR, intron and mRNA) is shown. Vertical axis shows the nucleotide polymorphism  $P_i$ , and the horizontal axis represents *G2-like* genes in maize.

doi:10.1371/journal.pone.0161763.g006

We compared the number of unique fixed SNPs in each *G2-like* gene in the tropical and temperate lines, respectively (Fig 7A). Results showed that *G2-like* genes of tropical lines have much more unique fixed SNP sites compared to temperate lines. Only five genes (*ZmG5*, *ZmG23*, *ZmG17*, *ZmG19* and *ZmG46*) have as many or more unique fixed SNP sites in temperate versus tropical lines. However, the total number of fixed SNP statistics showed that *ZmG* genes shared more same fixed SNPs than their unique fixed SNPs in both tropical and temperate lines (Fig 7A), suggesting that these SNPs may be not selected based on the environment relative to temperature. Furthermore, the total number of fixed SNPs in tropical and temperate lines was analyzed (Fig 7B), revealing that more fixed SNPs of tropical lines are present than temperate lines. The frequency of fixed SNP exhibited variation that is always proportional to the number of SNPs per gene (the SNP frequency is the ratio of the total SNP number of each gene with their corresponding coding sequence length) (Fig 7B). However, 42 of 59 *ZmG* genes in tropical lines have higher fixed SNP frequency than temperate lines (Fig 7C).

## Discussion

Interestingly, in this study, 59 *G2-like* genes were identified in maize and a same set of *G2-like* gene was identified in GRASSIUS (<http://grassius.org/grasstfdb.html>) database ever (S3 Text). And *ZmG* genes in this study matched the list in GRASSIUS, except for one (*ZmG34* and *ZmGLK12*). We checked these two genes, and found that *ZmGLK12* does not contain Myb\_DNA-binding domain, but *ZmG34* contains, indicating *ZmGLK12* was not *G2-like* gene.

**Table 3. Ka/Ks and selection pressure on diverse G2-like genes.**

| Gene ID | Ka       | Ks       | Ka/Ks    | selection Pressure |
|---------|----------|----------|----------|--------------------|
| ZmG1    | 0.000796 | 0.002883 | 0.275923 | Negative selection |
| ZmG5    | 0.001525 | 0.003635 | 0.419355 | Negative selection |
| ZmG6    | 0.000968 | 0.003109 | 0.311423 | Negative selection |
| ZmG9    | 0.001677 | 0.006709 | 0.249946 | Negative selection |
| ZmG11   | 0.000879 | 0.001751 | 0.50206  | Negative selection |
| ZmG14   | 0.000763 | 0.002921 | 0.261349 | Negative selection |
| ZmG15   | 0.001667 | 0.00301  | 0.553781 | Negative selection |
| ZmG17   | 0.001898 | 0.003724 | 0.509689 | Negative selection |
| ZmG24   | 0.000871 | 0.001564 | 0.556699 | Negative selection |
| ZmG26   | 0.001311 | 0.004799 | 0.273232 | Negative selection |
| ZmG27   | 0.000316 | 0.006472 | 0.048882 | Negative selection |
| ZmG30   | 0.002397 | 0.01413  | 0.169648 | Negative selection |
| ZmG33   | 0.000548 | 0.002577 | 0.212772 | Negative selection |
| ZmG34   | 0.005853 | 0.002575 | 2.273277 | positive selection |
| ZmG35   | 0.001462 | 0        |          |                    |
| ZmG37   | 0.00091  | 0.002306 | 0.394459 | Negative selection |
| ZmG38   | 0.00016  | 0.007295 | 0.021897 | Negative selection |
| ZmG39   | 0.001992 | 0        |          |                    |
| ZmG41   | 0.000674 | 0.005051 | 0.133499 | Negative selection |
| ZmG46   | 0.00076  | 0.006038 | 0.125846 | Negative selection |
| ZmG53   | 0.000275 | 0.003129 | 0.08802  | Negative selection |
| ZmG54   | 0.000958 | 0.002034 | 0.470698 | Negative selection |
| ZmG58   | 0.001525 | 0.003635 | 0.419355 | Negative selection |

doi:10.1371/journal.pone.0161763.t003

In this study, numerous segmental duplications of maize *G2-like* genes were identified, indicating that segmental duplication was the main contributor to the expansion of maize *G2-like* genes. In tissues expression patterns, Pattern B contains the most duplicated genes (11 of 30 duplication genes), exhibited little or no expression in any tissue or organ, indicating some of these genes are pseudogenes or silenced paralogs. In general, segmental duplications are thought to occur regularly in more slowly evolving gene families. Thus we speculated that *G2-like* genes have been considerably conserved during the process of evolution. Since maize underwent whole genome duplication (WGD) event after diverging from sorghum, there ought to be twice as many *GLK* genes, but it is not double, clearly some have been lost 45 in sorghum versus 59 in maize. A phylogenetic comparison of *G2-like* genes between maize and sorghum divided 104 *G2-like* members into six clades, with *ZmGs* and *SbGs* appear to be more closely to each other. Moreover, synteny analysis showed, strongly conserved microsyntny among regions hosting *G2-like* genes across maize and sorghum was observed, further illustrated these genes derived from gene duplication.

The evolution of maize *G2-like* genes may have occurred during maize genome evolution. *G2-like* genes were amplified through duplication, which enabled C4 plants to undergo sub-functionalization, in turn enabling the development of cell-specific functions in dimorphic chloroplasts [44]. Current evidence suggests that the ancestral state was a single *G2-like* gene and that *G2-like* gene duplication enabled subfunctionalization [45]. Moreover, *G2-like* gene duplication preconditioned the evolution of chloroplast dimorphism. According to classical theory, when gene duplication occurs, each copy of the gene has two possible fates: (1) in most cases, a copy retains the original features, which are stabilized through negative selection; (2)

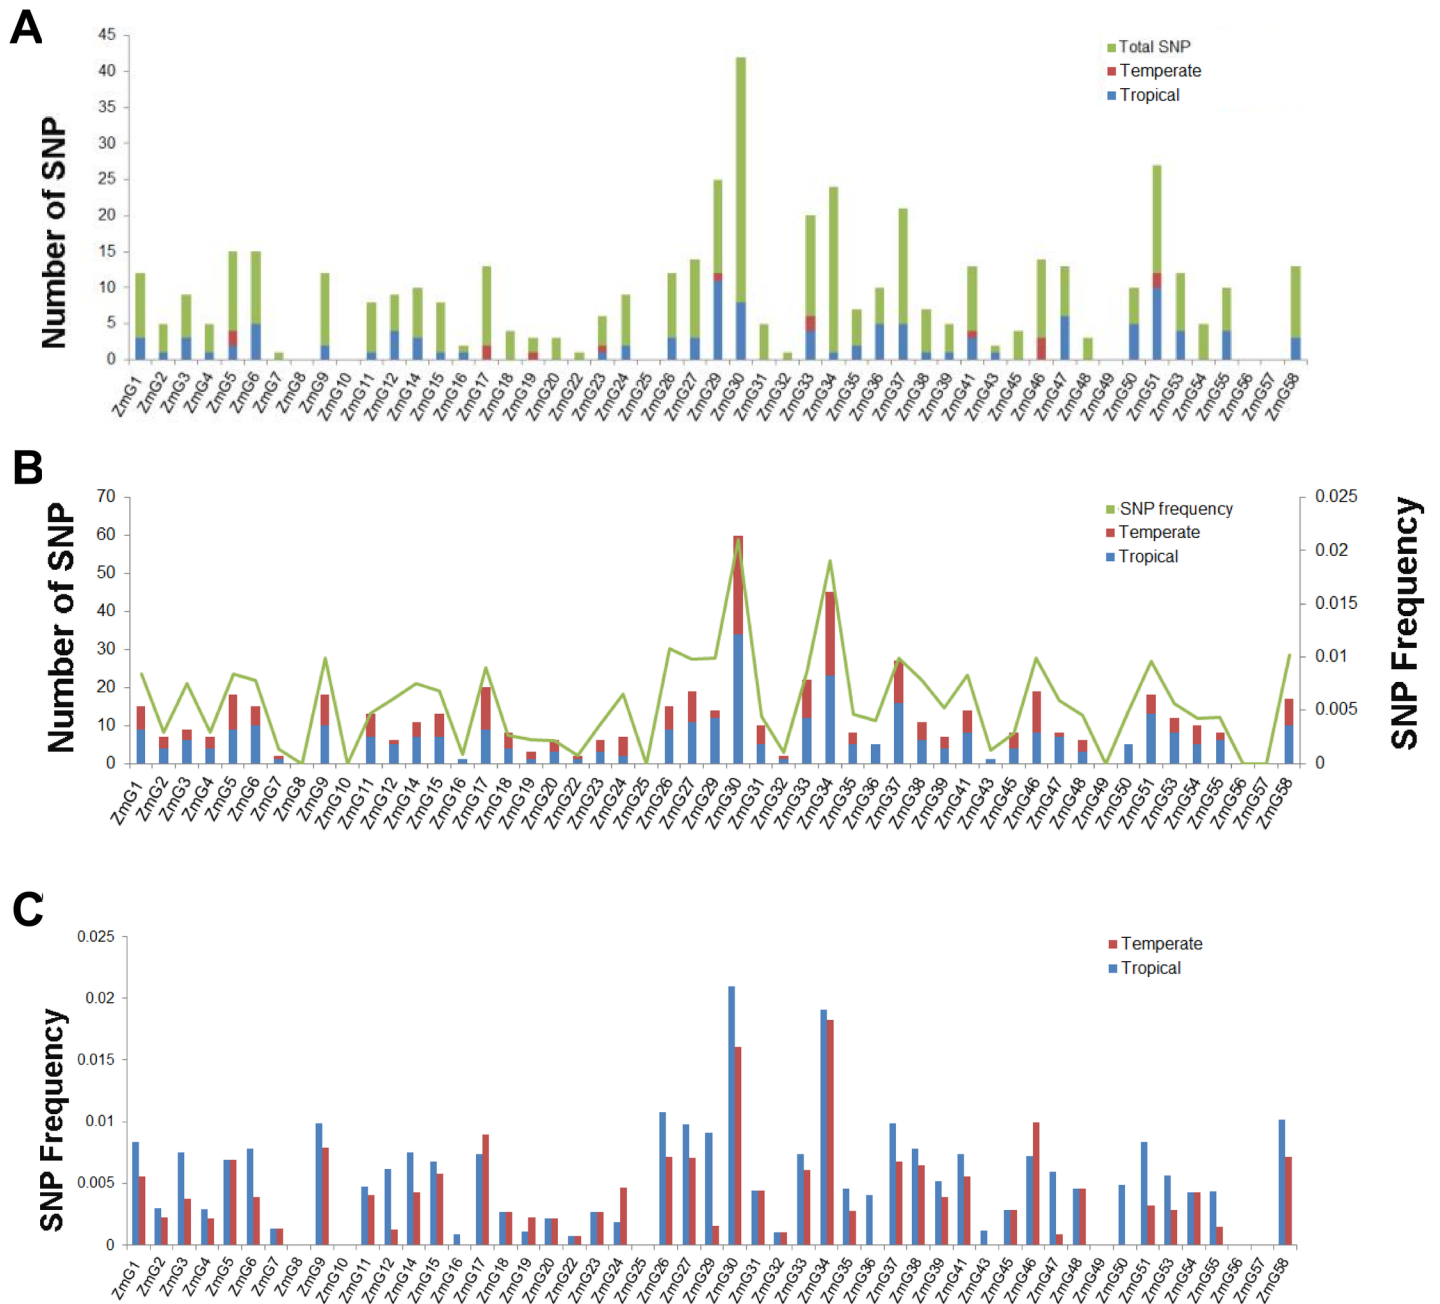

**Fig 7. Number of SNPs in each *G2-like* gene (CDS sequence) among 85 maize inbred lines.** Blue boxes represent the number of SNPs in tropical lines, red boxes represent the number of SNPs in temperate lines, green boxes represent the total number of SNPs and green lines indicate SNP frequency. (A) Number of tropical and temperate fixed SNPs and total number of SNPs in 85 maize inbred lines. (B) Number of SNPs in *G2-like* genes in tropical and temperate lines and SNP frequency. (C) Comparisons of tropical and temperate lines SNP frequency.

doi:10.1371/journal.pone.0161763.g007

the remaining copy does not undergo selection and becomes pseudogenic. This theory helps explain the slow evolution of *G2-like* genes and a certain level of total number of genes, further illustrating the highly conserved evolution of chloroplast. In rare cases, one copy of gene undergoes more adaptation, drive the evolution of gene function [46]. Based on analysis of *G2-like* gene family, we proposed that this family belongs to the former category, that is, the function of this gene family has been stabilized by duplication.

Furthermore, SNPs analysis of maize *ZmG* genes in natural population revealed the influences of temperature and humidity on *ZmGs*. Polymorphism analysis of *G2-like* genes in different conserved regions (Fig 6) revealed that highly diverse Type III includes the largest number of genes, which might have quickly evolved to adapt to environment, while highly conserved Type I includes the fewest genes, which may play an important role in basic functions rather than adaptation to temperature or humidity conditions. Selection pressure was revealed for genes in Type III, while only one gene (*ZmG34*) was under positive selection (Table 3), indicating that this family tends to retain vary in order to maintain stability. However, the variation retained in *ZmG34* might result from its significant role in growth and development in maize. And the expression pattern of *ZmG34* also suggested its importance. Genetic diversity analysis of *G2-like* genes between tropical and temperate lines (based on CDS) revealed 11 genes with  $P_i$  values lower than 0.01, which may be related to their role in the response to temperature and light conditions. These genes will be a focus for future research aimed at elucidating the influence of temperature and humidity conditions on maize growth. In these genes, *ZmG47* had a high level of genetic differentiation, and a high level expression in all tissues, we hypothesized that this gene may have significant roles in the formation and evolution of chloroplast.

In addition to total SNPs number, compared to temperate lines, more SNPs of *ZmG* genes were fixed in tropical lines. It suggested that these SNPs were selected based on the environment, which may relate to temperature and humidity. Our promoter element analysis results support this view, as promoters of these genes include DRE, ABRE, and LTRE resistance elements [47,48], and qRT-PCR results supported this view, too. In addition, a recent report suggested that *G2-like* genes play a role in the temperature stress response, as increased accumulation of *G2-like1* was observed in frost-tolerant transgenic *Brassica napus* overexpressing two transcripts harboring DREB1/CBFs [49]. These stress-related genes are induced in order to adapt to environmental stresses. Overexpression of *AtGLK1* (35S: *AtGLK1*) in *Arabidopsis* confers resistance to the cereal pathogen *Fusarium graminearum* [27]. Thus, we speculate that maize *G2-like* gene family might have a function in stress and disease resistance. In addition, as *ZmG34* was significantly up-regulated by low temperature and drought stress, moreover, it was subjected to positive selection in natural population lines; we convinced more on this gene's importance in crop breeding.

Due to highly conserved evolution of *G2-like* genes, we speculated these genes might play vital roles in maize growth and development. Moreover, both of these genes polymorphism and expression were sensitive for environment; further exploration of them would serve as useful information for maize culture in drought or cold environment.

## Supporting Information

**S1 Fig. *G2-like* genes sequences in maize, rice and Arabidopsis.** Pileup multiple sequence alignment of maize *ZmG1–59*, rice *OsGLK1–2* and Arabidopsis *AtGLK1–2* GLK proteins. The putative DNA binding domain folds into an HLH structure. Black horizontal bars indicate the predicted  $\alpha$ -helix segments conserved in all proteins. The GCT box is delimited, marked by red horizontal bars. (TIF)

**S2 Fig. Phylogenetic relationship of maize *G2-like* proteins with the other *G2-like* proteins.** (TIF)

**S3 Fig. Synteny of sorghum *G2-like* genes regions.** Numbers along each chromosome box indicate sequence lengths in megabases. All the syntenic genes were located in sorghum chromosome, and linked by red lines. (TIF)



**S4 Fig. Expression profile of *ZmG* genes in response to drought and cold stress.** The Y-axis is the scale of relative expression levels. The X-axis is time courses of stress treatments. Error bars, +SE. (A) Relative expression levels of the twenty stress-responsive *G2-like* genes in response to drought stress. Seedlings were sampled at 0 h (CK), 6 h, 12 h, and 24 h after drought treatment. (B) Relative expression levels of the twenty stress-responsive *G2-like* genes in response to low temperature treatment (4°C). Seedlings were sampled at 0 h (CK), 0.5 h, 1 h, 2 h, 3 h and 6 h after 4°C treatment.  
(TIF)

**S1 Table. Basic information about *G2-like* genes in maize.**  
(DOC)

**S2 Table. Motif sequences identified using MEME tools.**  
(DOCX)

**S3 Table. *G2-like* genes in Sorghum.**  
(DOCX)

**S4 Table. Collinear gene pairs in sorghum.**  
(DOCX)

**S5 Table. Orthologous gene pairs between maize and sorghum.**  
(DOCX)

**S6 Table. Genetic diversity of *G2-like* genes between tropical (Tro) and temperate (Tem) inbred maize lines.**  
(DOCX)

**S7 Table. qRT-PCR primers of maize *G2-like* genes.**  
(DOCX)

**S1 Text. CDS, gene and protein sequences of maize *G2-like* genes in this study.**  
(TXT)

**S2 Text. Protein sequences of sorghum *G2-like* genes in this study.**  
(TXT)

**S3 Text. CDS and protein sequences of maize *GLK* genes in GRASS website.**  
(TXT)

## Acknowledgments

We thank all the members of the Key Laboratory of Crop Biology of Anhui province for their assistance in this study.

## Author Contributions

**Conceptualization:** FL YX.

**Funding acquisition:** XL SZ.

**Investigation:** FL YX.

**Methodology:** XL FL YX.

**Resources:** XL SZ.

**Software:** FL YX LZ GH.

**Supervision:** XL.

**Writing – original draft:** FL YX.

**Writing – review & editing:** XL SZ GH AA.

## References

1. Jarvis P, Lopez-Juez E (2013) Biogenesis and homeostasis of chloroplasts and other plastids. *Nature Reviews Molecular Cell Biology* 14: 787–802. doi: [10.1038/nrm3702](https://doi.org/10.1038/nrm3702) PMID: [24263360](https://pubmed.ncbi.nlm.nih.gov/24263360/)
2. Jarvis P, Lopez-Juez E (2014) Biogenesis and homeostasis of chloroplasts and other plastids (vol 14, pg 787, 2013). *Nature Reviews Molecular Cell Biology* 15: 147–147.
3. Eberhard S, Finazzi G, Wollman FA (2008) The Dynamics of Photosynthesis. *Annual Review of Genetics* 42: 463–515. doi: [10.1146/annurev.genet.42.110807.091452](https://doi.org/10.1146/annurev.genet.42.110807.091452) PMID: [18983262](https://pubmed.ncbi.nlm.nih.gov/18983262/)
4. Waters MT, Langdale JA (2009) The making of a chloroplast. *Embo Journal* 28: 2861–2873. doi: [10.1038/emboj.2009.264](https://doi.org/10.1038/emboj.2009.264) PMID: [19745808](https://pubmed.ncbi.nlm.nih.gov/19745808/)
5. Becker SFS, Mayor R, Kashef J (2013) Cadherin-11 Mediates Contact Inhibition of Locomotion during *Xenopus* Neural Crest Cell Migration. *Plos One* 8: e85717. doi: [10.1371/journal.pone.0085717](https://doi.org/10.1371/journal.pone.0085717) PMID: [24392028](https://pubmed.ncbi.nlm.nih.gov/24392028/)
6. Parente DJ, Swint-Kruse L (2013) Multiple Co-Evolutionary Networks Are Supported by the Common Tertiary Scaffold of the LacI/GalR Proteins. *Plos One* 8: e84398. doi: [10.1371/journal.pone.0084398](https://doi.org/10.1371/journal.pone.0084398) PMID: [24391951](https://pubmed.ncbi.nlm.nih.gov/24391951/)
7. Douglas SE (1998) Plastid evolution: origins, diversity, trends. *Curr Opin Genet Dev* 8: 655–661. PMID: [9914199](https://pubmed.ncbi.nlm.nih.gov/9914199/)
8. Moreira D, Le Guyader H, Philippe H (2000) The origin of red algae and the evolution of chloroplasts. *Nature* 405: 69–72. PMID: [10811219](https://pubmed.ncbi.nlm.nih.gov/10811219/)
9. Lopez-Juez E, Pyke KA (2005) Plastids unleashed: their development and their integration in plant development. *International Journal of Developmental Biology* 49: 557–577. PMID: [16096965](https://pubmed.ncbi.nlm.nih.gov/16096965/)
10. Park J, Werley CA, Venkatachalam V, Kralj JM, Dib-Hajj SD, Waxman SG, et al. (2013) Screening Fluorescent Voltage Indicators with Spontaneously Spiking HEK Cells. *Plos One* 8: e85221. doi: [10.1371/journal.pone.0085221](https://doi.org/10.1371/journal.pone.0085221) PMID: [24391999](https://pubmed.ncbi.nlm.nih.gov/24391999/)
11. Neuhaus HE, Emes MJ (2000) Nonphotosynthetic metabolism in plastids. *Annual Review of Plant Physiology and Plant Molecular Biology* 51: 111–140. PMID: [15012188](https://pubmed.ncbi.nlm.nih.gov/15012188/)
12. Charuvi D, Kiss V, Nevo R, Shimoni E, Adam Z, Reich Z, et al. (2012) Gain and Loss of Photosynthetic Membranes during Plastid Differentiation in the Shoot Apex of Arabidopsis. *Plant Cell* 24: 1143–1157. doi: [10.1105/tpc.111.094458](https://doi.org/10.1105/tpc.111.094458) PMID: [22438022](https://pubmed.ncbi.nlm.nih.gov/22438022/)
13. Lopez-Juez E, Dillon E, Magyar Z, Khan S, Hazeldine S, de Jager SM, et al. (2008) Distinct light-initiated gene expression and cell cycle programs in the shoot apex and cotyledons of Arabidopsis. *Plant Cell* 20: 947–968. doi: [10.1105/tpc.107.057075](https://doi.org/10.1105/tpc.107.057075) PMID: [18424613](https://pubmed.ncbi.nlm.nih.gov/18424613/)
14. Seu L, Ortiz GM, Epling L, Sinclair E, Swainson LA, Bajpai UD, et al. (2013) Higher CD27(+)CD8(+) T Cells Percentages during Suppressive Antiretroviral Therapy Predict Greater Subsequent CD4(+) T Cell Recovery in Treated HIV Infection. *Plos One* 8: e84091. doi: [10.1371/journal.pone.0084091](https://doi.org/10.1371/journal.pone.0084091) PMID: [24391889](https://pubmed.ncbi.nlm.nih.gov/24391889/)
15. Jiao YL, Lau OS, Deng XW (2007) Light-regulated transcriptional networks in higher plants. *Nature Reviews Genetics* 8: 217–230. PMID: [17304247](https://pubmed.ncbi.nlm.nih.gov/17304247/)
16. Li PH, Ponnala L, Gandotra N, Wang L, Si YQ, Tausta SL, et al. (2010) The developmental dynamics of the maize leaf transcriptome. *Nature Genetics* 42: 1060–U1051. doi: [10.1038/ng.703](https://doi.org/10.1038/ng.703) PMID: [21037569](https://pubmed.ncbi.nlm.nih.gov/21037569/)
17. La Marca M, Befy P, Pugliese A, Longo V (2013) Fermented Wheat Powder Induces the Antioxidant and Detoxifying System in Primary Rat Hepatocytes. *Plos One* 8: e83538. doi: [10.1371/journal.pone.0083538](https://doi.org/10.1371/journal.pone.0083538) PMID: [24391783](https://pubmed.ncbi.nlm.nih.gov/24391783/)
18. Riechmann JL, Heard J, Martin G, Reuber L, Jiang CZ, Keddie J, et al. (2000) Arabidopsis transcription factors: Genome-wide comparative analysis among eukaryotes. *Science* 290: 2105–2110. PMID: [11118137](https://pubmed.ncbi.nlm.nih.gov/11118137/)
19. Yasumura Y, Moylan EC, Langdale JA (2005) A conserved transcription factor mediates nuclear control of organelle biogenesis in anciently diverged land plants. *Plant Cell* 17: 1894–1907. PMID: [15923345](https://pubmed.ncbi.nlm.nih.gov/15923345/)
20. Gao HB, Kadirjan-Kalbach D, Froehlich JE, Osteryoung KW (2003) ARC5, a cytosolic dynamin-like protein from plants, is part of the chloroplast division machinery. *Proceedings of the National Academy of Sciences of the United States of America* 100: 4328–4333. PMID: [12642673](https://pubmed.ncbi.nlm.nih.gov/12642673/)

21. Tang WJ, Wang WQ, Chen DQ, Ji Q, Jing YJ, Wang HY, et al. (2012) Transposase-Derived Proteins FHY3/FAR1 Interact with PHYTOCHROME-INTERACTING FACTOR1 to Regulate Chlorophyll Biosynthesis by Modulating HEMB1 during Deetiolation in Arabidopsis. *Plant Cell* 24: 1984–2000. doi: [10.1105/tpc.112.097022](https://doi.org/10.1105/tpc.112.097022) PMID: [22634759](https://pubmed.ncbi.nlm.nih.gov/22634759/)
22. Rossini L, Cribb L, Martin DJ, Langdale JA (2001) The maize Golden2 gene defines a novel class of transcriptional regulators in plants. *Plant Cell* 13: 1231–1244. PMID: [11340194](https://pubmed.ncbi.nlm.nih.gov/11340194/)
23. Fitter DW, Martin DJ, Copley MJ, Scotland RW, Langdale JA (2002) GLK gene pairs regulate chloroplast development in diverse plant species. *Plant Journal* 31: 713–727. PMID: [12220263](https://pubmed.ncbi.nlm.nih.gov/12220263/)
24. Hall LN, Rossini L, Cribb L, Langdale JA (1998) GOLDEN 2: a novel transcriptional regulator of cellular differentiation in the maize leaf. *Plant Cell* 10: 925–936. PMID: [9634581](https://pubmed.ncbi.nlm.nih.gov/9634581/)
25. Waters MT, Wang P, Korkaric M, Capper RG, Saunders NJ, Langdale JA, et al. (2009) GLK transcription factors coordinate expression of the photosynthetic apparatus in Arabidopsis. *Plant Cell* 21: 1109–1128. doi: [10.1105/tpc.108.065250](https://doi.org/10.1105/tpc.108.065250) PMID: [19376934](https://pubmed.ncbi.nlm.nih.gov/19376934/)
26. Powell AL, Nguyen CV, Hill T, Cheng KL, Figueroa-Balderas R, Aktas H, et al. (2012) Uniform ripening encodes a Golden 2-like transcription factor regulating tomato fruit chloroplast development. *Science* 336: 1711–1715. doi: [10.1126/science.1222218](https://doi.org/10.1126/science.1222218) PMID: [22745430](https://pubmed.ncbi.nlm.nih.gov/22745430/)
27. Tan XP, Meyers BC, Kozik A, Al West M, Morgante M, St Clair DA, et al. (2007) Global expression analysis of nucleotide binding site-leucine rich repeat-encoding and related genes in Arabidopsis. *Bmc Plant Biology* 7: 56. PMID: [17956627](https://pubmed.ncbi.nlm.nih.gov/17956627/)
28. Kretschmer M, Reiner E, Hu GG, Tam N, Oliveira DL, Caza M, et al. (2014) Defects in Phosphate Acquisition and Storage Influence Virulence of *Cryptococcus neoformans*. *Infection and Immunity* 82: 2697–2712. doi: [10.1128/IAI.01607-14](https://doi.org/10.1128/IAI.01607-14) PMID: [24711572](https://pubmed.ncbi.nlm.nih.gov/24711572/)
29. Tamura K, Stecher G, Peterson D, Filipinski A, Kumar S (2013) MEGA6: Molecular Evolutionary Genetics Analysis Version 6.0. *Molecular Biology and Evolution* 30: 2725–2729. doi: [10.1093/molbev/mst197](https://doi.org/10.1093/molbev/mst197) PMID: [24132122](https://pubmed.ncbi.nlm.nih.gov/24132122/)
30. Bailey TL, Elkan C (1995) The value of prior knowledge in discovering motifs with MEME. *Proc Int Conf Intell Syst Mol Biol* 3: 21–29. PMID: [7584439](https://pubmed.ncbi.nlm.nih.gov/7584439/)
31. Hu B, Jin J, Guo AY, Zhang H, Luo J, Gao G, et al. (2015) GSDS 2.0: an upgraded gene feature visualization server. *Bioinformatics* 31: 1296–1297. doi: [10.1093/bioinformatics/btu817](https://doi.org/10.1093/bioinformatics/btu817) PMID: [25504850](https://pubmed.ncbi.nlm.nih.gov/25504850/)
32. Wang Y, Tang H, Debarry JD, Tan X, Li J, Wang X, et al. (2012) MCScanX: a toolkit for detection and evolutionary analysis of gene synteny and collinearity. *Nucleic Acids Res* 40: e49. doi: [10.1093/nar/gkr1293](https://doi.org/10.1093/nar/gkr1293) PMID: [22217600](https://pubmed.ncbi.nlm.nih.gov/22217600/)
33. Krzywinski M, Schein J, Birol I, Connors J, Gascoyne R, Horsman D, et al. (2009) Circos: an information aesthetic for comparative genomics. *Genome Res* 19: 1639–1645. doi: [10.1101/gr.092759.109](https://doi.org/10.1101/gr.092759.109) PMID: [19541911](https://pubmed.ncbi.nlm.nih.gov/19541911/)
34. Librado P, Rozas J (2009) DnaSP v5: a software for comprehensive analysis of DNA polymorphism data. *Bioinformatics* 25: 1451–1452. doi: [10.1093/bioinformatics/btp187](https://doi.org/10.1093/bioinformatics/btp187) PMID: [19346325](https://pubmed.ncbi.nlm.nih.gov/19346325/)
35. Swanson WJ, Yang Z, Wolfner MF, Aquadro CF (2001) Positive Darwinian selection drives the evolution of several female reproductive proteins in mammals. *Proc Natl Acad Sci U S A* 98: 2509–2514. PMID: [11226269](https://pubmed.ncbi.nlm.nih.gov/11226269/)
36. Sekhon RS, Briskine R, Hirsch CN, Myers CL, Springer NM, Buell CR, et al. (2013) Maize Gene Atlas Developed by RNA Sequencing and Comparative Evaluation of Transcriptomes Based on RNA Sequencing and Microarrays. *Plos One* 8: e61005. doi: [10.1371/journal.pone.0061005](https://doi.org/10.1371/journal.pone.0061005) PMID: [23637782](https://pubmed.ncbi.nlm.nih.gov/23637782/)
37. Sekhon RS, Lin HN, Childs KL, Hansey CN, Buell CR, de Leon N, et al. (2011) Genome-wide atlas of transcription during maize development. *Plant Journal* 66: 553–563. doi: [10.1111/j.1365-313X.2011.04527.x](https://doi.org/10.1111/j.1365-313X.2011.04527.x) PMID: [21299659](https://pubmed.ncbi.nlm.nih.gov/21299659/)
38. Schmittgen TD, Livak KJ (2008) Analyzing real-time PCR data by the comparative C(T) method. *Nat Protoc* 3: 1101–1108. PMID: [18546601](https://pubmed.ncbi.nlm.nih.gov/18546601/)
39. Murmu J, Wilton M, Allard G, Pandeya R, Desveaux D, Singh J, et al. (2014) Arabidopsis GOLDEN2-LIKE (GLK) transcription factors activate jasmonic acid (JA)-dependent disease susceptibility to the biotrophic pathogen *Hyaloperonospora arabidopsidis*, as well as JA-independent plant immunity against the necrotrophic pathogen *Botrytis cinerea*. *Mol Plant Pathol* 15: 174–184. doi: [10.1111/mpp.12077](https://doi.org/10.1111/mpp.12077) PMID: [24393452](https://pubmed.ncbi.nlm.nih.gov/24393452/)
40. Cinquin O, Demongeot J (2005) High-dimensional switches and the modelling of cellular differentiation. *Journal of Theoretical Biology* 233: 391–411. PMID: [15652148](https://pubmed.ncbi.nlm.nih.gov/15652148/)
41. Massari ME, Murre C (2000) Helix-loop-helix proteins: Regulators of transcription in eucaryotic organisms. *Molecular and Cellular Biology* 20: 429–440. PMID: [10611221](https://pubmed.ncbi.nlm.nih.gov/10611221/)

42. Yang ZF, Zhou Y, Wang XF, Gu SL, Yu JM, Liang G H, et al. (2008) Genomewide comparative phylogenetic and molecular evolutionary analysis of tubby-like protein family in Arabidopsis, rice, and poplar. *Genomics* 92: 246–253. doi: [10.1016/j.ygeno.2008.06.001](https://doi.org/10.1016/j.ygeno.2008.06.001) PMID: [18620041](https://pubmed.ncbi.nlm.nih.gov/18620041/)
43. Hudson RR (1990) Genetic Data Analysis. Methods for Discrete Population Genetic Data. Bruce S. Weir. Sinauer, Sunderland, MA, 1990. xiv, 377 pp., illus. \$48; paper, \$27. *Science* 250: 575.
44. Bravo-Garcia A, Yasumura Y, Langdale JA (2009) Specialization of the Golden2-like regulatory pathway during land plant evolution. *New Phytologist* 183: 133–141. doi: [10.1111/j.1469-8137.2009.02829.x](https://doi.org/10.1111/j.1469-8137.2009.02829.x) PMID: [19383092](https://pubmed.ncbi.nlm.nih.gov/19383092/)
45. Wang P, Fouracre J, Kelly S, Karki S, Gowik U, Aubry S, et al. (2013) Evolution of GOLDEN2-LIKE gene function in C-3 and C-4 plants. *Planta* 237: 481–495. doi: [10.1007/s00425-012-1754-3](https://doi.org/10.1007/s00425-012-1754-3) PMID: [22968911](https://pubmed.ncbi.nlm.nih.gov/22968911/)
46. Prince VE, Pickett FB (2002) Splitting pairs: The diverging fates of duplicated genes. *Nature Reviews Genetics* 3: 827–837. PMID: [12415313](https://pubmed.ncbi.nlm.nih.gov/12415313/)
47. Narusaka Y, Nakashima K, Shinwari ZK, Sakuma Y, Furihata T, Abe H, et al. (2003) Interaction between two cis-acting elements, ABRE and DRE, in ABA-dependent expression of Arabidopsis rd29A gene in response to dehydration and high-salinity stresses. *Plant Journal* 34: 137–148. PMID: [12694590](https://pubmed.ncbi.nlm.nih.gov/12694590/)
48. Yamaguchi-Shinozaki K, Shinozaki K (2005) Organization of cis-acting regulatory elements in osmotic- and cold-stress-responsive promoters. *Trends in Plant Science* 10: 88–94. PMID: [15708346](https://pubmed.ncbi.nlm.nih.gov/15708346/)
49. Savitch LV, Allard G, Seki M, Robert LS, Tinker NA, Huner NPA, et al. (2005) The effect of overexpression of two Brassica CBF/DREB1-like transcription factors on photosynthetic capacity and freezing tolerance in Brassica napus. *Plant and Cell Physiology* 46: 1525–1539. PMID: [16024910](https://pubmed.ncbi.nlm.nih.gov/16024910/)
